# Supplementary material
Source: PubMed Central journal article supplement (PMC3009834)
Supplement: 1009182107_pnas.1009182107_SI.pdf [file 1009182107_pnas.1009182107_SI.pdf]

# Supporting Information

Khodyreva et al. 10.1073/pnas.1009182107

## SI Experimental Procedures.

**Purification of the Cross-Linked Protein-DNA Complex Using Streptavidin-Coated Beads.** Preparative cross-linking was essentially as described under *Materials and Methods*. The volume of the reaction mixture was increased to 1.3 mL. Apurinic/aprimidinic (AP)-DNA contained a biotinylated dUMP moiety introduced as described under *Materials and Methods*, "Preparation of linear duplex DNA." To increase the yield of cross-linked protein and decrease nonspecific binding of proteins to the streptavidin resin, we used bovine testis nuclear extract (BTNE). The final BTNE protein concentration in the reaction mixture for cross-linking was 2.8 mg/mL. After completion of the reduction step, magnetic beads with immobilized streptavidin (300  $\mu$ L of the resin suspension prepared as recommended by the manufacturer) were added to the reaction mixture. The mixture was then incubated at room temperature for 60 min with constant mild agitation. The resin was washed six times by resuspension and sedimentation with a magnet using 300  $\mu$ L of wash buffer (50 mM Tris-HCl, pH 8.0, and 2 M NaCl) and two times in 300  $\mu$ L of 50 mM Tris-HCl, pH 7.5, and 75 mM NaCl. Then, 50  $\mu$ L of gel-loading dye was added to the beads, followed by heating at 95 °C for 20 min. The sample was resolved by 10% SDS-PAGE followed by staining with Coomassie blue. Then, the wet gel was exposed to X-ray film overnight at 0 °C. A well-defined protein band that corresponded to the radioactive band was excised from the gel. The excised gel band was rinsed with 100  $\mu$ L of water and destained by treatment with 50  $\mu$ L of 25 mM  $\text{NH}_4\text{HCO}_3$ /50%  $\text{CH}_3\text{CN}$  for 20 min. The solution was decanted and 50  $\mu$ L of the same solution was added. These steps were repeated until the stain was gone. After incubation with 50  $\mu$ L of acetonitrile for 10 min and removal of the solvent, the gel slices were dried by vacuum centrifugation. Dried slices were rehydrated in 50  $\mu$ L of 50 mM  $\text{NH}_4\text{HCO}_3$  buffer containing trypsin (1  $\mu$ M) for 1 h at 4 °C. Trypsinolysis was performed for 18 h at 37 °C. Peptides were extracted from the gel 3 times in 25  $\mu$ L of 50% acetonitrile/5% formic acid, dried, and dissolved in 5  $\mu$ L 0.1% TFA (aqueous solution). The sample (1  $\mu$ L) was mixed with 1  $\mu$ L of the MALDI matrix material (saturated solution of  $\alpha$ -cyano-4-hydroxycinnamic acid in a mixture of acetonitrile and 0.1% aqueous solution of TFA, 1:2 vol/vol). The REFLEX III mass spectrometer (Bruker Daltonics Inc.) was operated in the reflector mode at 23 kV acceleration. Spectra were obtained from an average of 600 laser shots over the  $m/z$  range 1,000–5,000. Peptide mass mapping was performed using the Mascot software and National Center for Biotechnology Information protein database at [www.expasy.org](http://www.expasy.org).

**Oligonucleotides.** Synthetic oligonucleotides were obtained from the Laboratory of Medicinal Chemistry (Institute of Chemical Biology and Fundamental Medicine, Siberian Branch of the Rus-

sian Academy of Sciences) and Oligos Etc., Inc. Sequences of oligonucleotides were as follows:

- (I) 5'-GGAAGACCCTGACGTTACCCAACCTAATCGCC-3' – template;
- (II) 5'-GGCGATTAAGTTGGGUAACGTCAGGGTCTTC-C-3';
- (III) 5'-GGCGATTAAGTTGGGTHFAACGTCAGGGTCTTCC-3';
- (IV) 5'-GGCGATTAAGTTGGG-3';
- (VI) 5'-pTHFAACGTCAGGGTCTTCC-3';
- (VI) 5'-CTGCAGCTGATGCGC UGTACGGATCCCCGGGTAC-3';
- (VII) 5'-GTACCCGGGATCCGTACGGCGCATCAGCTGCAG-3';
- (VIII) 5'-pGCACGGCGCATCAGCTGCAGAACAACCTGCAGCTGATGCGC-THF-GTGC GGATCCGGTGCAACAAGCACCGGATCC-3';
- (IX) 5'-pGCACGGCGCATCAGCTGCAGAACAACCTGCAGCTGATGCGC-U-GTGC GGATCCGGTGCAACAAGCACCGGATCC-3';
- (X) 5'-pGCACGGCGCATCAGCTGCAGAACAACCTGCAGCTGATGCGC-C-GTGC GGATCCGGTGCAACAAGCACCGGATCC-3';
- (XI) 5'-ATGCAAGCTTGGCGTAATCA-3', 5'-CCAACGCTCAACAGTAGGGC-3', 5'-ATTCGGTCGCTGAGGC-TTGC-3' – primers for M13mp19.

**Preparation of Double-Hairpin DNA Substrates.**  $^{32}\text{P}$ -labeled or unlabeled oligonucleotide (IX to XI) that contained a double-hairpin sequence was annealed under the following conditions: 95 °C for 5 min; 65 °C for 30 min; cooling down from 65 °C to 10 °C at 1 °C/min. The oligonucleotide was then ligated with T4 DNA ligase for 1 h at room temperature. Denaturing polyacrylamide gel electrophoresis was used to separate the ligated and unligated forms of the oligonucleotide. Then, autoradiography and UV shadowing was used to locate the ligated vs. unligated DNA. Gel slices were cut and smashed, and the ligated form of the DNA substrate was eluted with diffusion buffer (0.5 M ammonium acetate, 10 mM  $\text{Mg}^{2+}$ , 1 mM EDTA, 0.1% SDS) overnight at room temperature. Smashed gel was removed with a spin column (Pall Life Science, P/N ODGHPC34), and the DNA was precipitated with 0.3 M sodium acetate, two volumes of 100% ethanol and 70  $\mu$ g/mL linear acrylamide at –80 °C for 2 h. The DNA pellet was washed once with 70% ethanol, lyophilized, and then resuspended in TE (10 mM Tris-HCl, pH 8.0, and 1 mM EDTA) buffer. The concentration of DNA was determined, and it was stored in small aliquots at –30 °C.

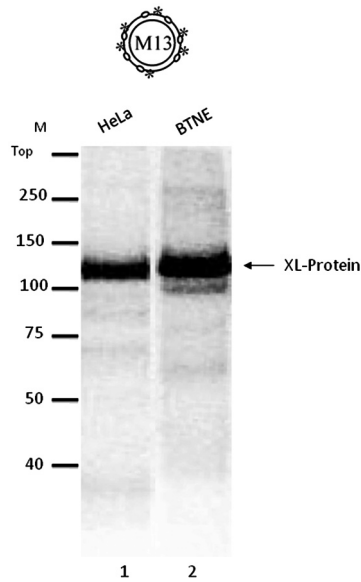

**Fig. S1.** NaBH<sub>4</sub> cross-linking of proteins in BTNE and HeLa whole cell extracts. The reaction conditions and product analysis were as described under *Materials and Methods*. <sup>32</sup>P-labeled AP site-containing circular DNA substrate (20 nM) was reacted with extracts (1.25 mg/mL) for 15 min at 37 °C. NaBH<sub>4</sub> was then added to a final concentration of 20 mM and further incubated on 0 °C for 30 min. Covalently cross-linked DNA–protein products with circular DNA were treated with benzonase (12 units) for 15 min at 37 °C. The cross-linked products (XL protein) were separated by SDS-PAGE (1). Representative phosphorimages illustrating the cross-linking of proteins in HeLa cell extract and BTNE are shown. The positions of protein markers and XL-protein are indicated. Schematic representation of DNA is illustrated at the top. The symbol “\*” denotes the position of <sup>32</sup>P-label on DNA. The bubble like symbol denotes the AP site(s) in DNA.

1. Laemmli UK (1970) Cleavage of structural proteins during the assembly of the head of bacteriophage T4. *Nature* 227:680–685.

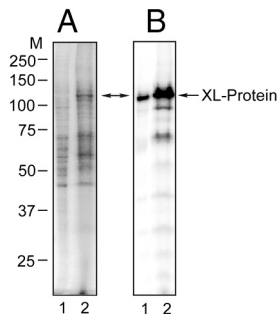

**Fig. S2.** Isolation and purification of the cross-linked protein–DNA complex. A reaction mixture (1.3 mL) containing BTNE (2.8 mg/mL) and [<sup>32</sup>P]-labeled biotinylated AP-DNA (100 nM) was treated as described above under *Materials and Methods*. Following NaBH<sub>4</sub> cross-linking, the reaction mixture was further processed as described. (A) Coomassie blue stained gel. Lane 1, 10 μL aliquot of the reaction mixture; lane 2, eluant from beads. (B) Autoradiograph of the gel in A. Positions of <sup>32</sup>P-labeled protein–DNA band that was excised and subjected to mass spectrometry analysis and protein markers are indicated.
